# Supplementary material for: A network of RNA-binding proteins controls translation efficiency to activate anaerobic metabolism
Source: PubMed Central journal article supplement (PMC7260222; doi:10.1038/s41467-020-16504-1), 2020-05-29
Supplement: 41467_2020_16504_MOESM1_ESM.pdf [file 41467_2020_16504_MOESM1_ESM.pdf]

## **Supplementary Information**

### **A Network of RNA-Binding Proteins Controls Translation Efficiency to Activate Anaerobic Metabolism**

Ho *et al.*

**a MATRIX**

**1. Metabolic pulse-labeling**

Cells cultured in "light" SILAC media for 1 wk.

Cells subjected to normoxia (21% O<sub>2</sub>) or hypoxia (1% O<sub>2</sub>) for 24 hr.

Cells pulsed with "heavy" SILAC media for last 4 hr of treatment.

**2. Ribosome density fractionation**

Separates translational assets based on biological activity in living cells.

"Free" fraction: not engaged in protein synthesis. "Monosome": translation initiation. "Polysome": intense translation.

**3. Mass spectrometry (MS) analysis**

Orthogonal high pH reverse-phased peptide fractionation.

Liquid chromatography-tandem MS (Orbitrap Elite™ mass spectrometer).

Translational assets analyzed using label free quantitation of "light" MS signals, excluding "heavy" MS signals derived from newly synthesized peptides.

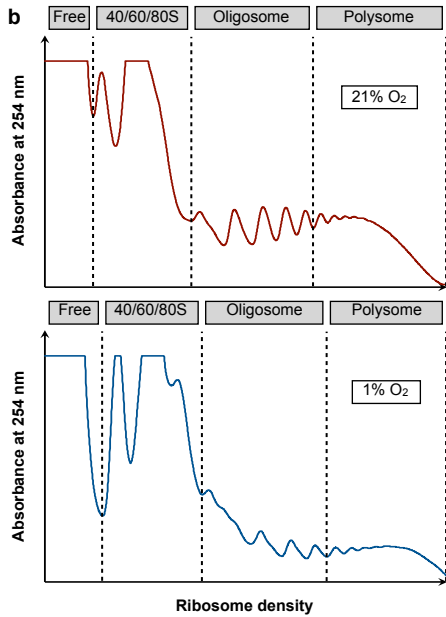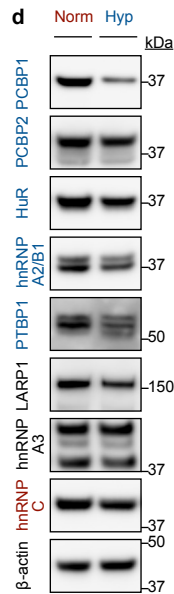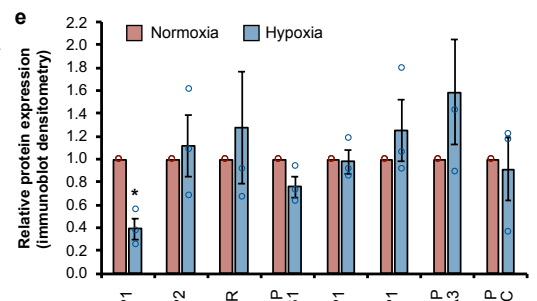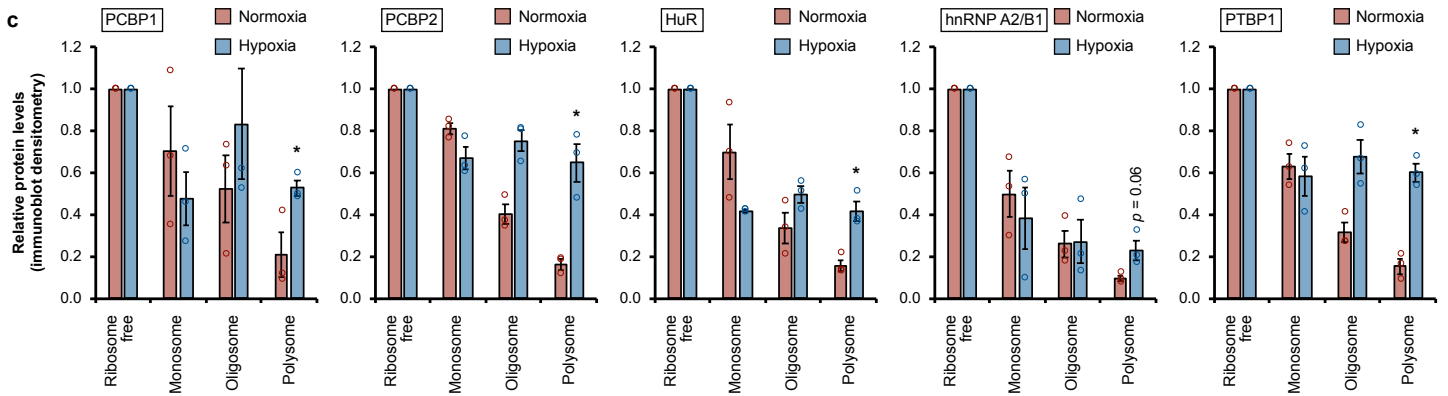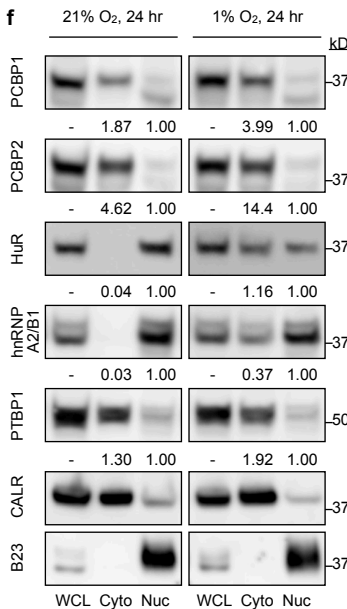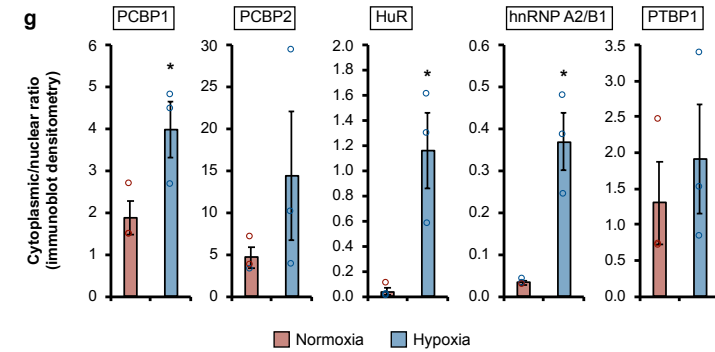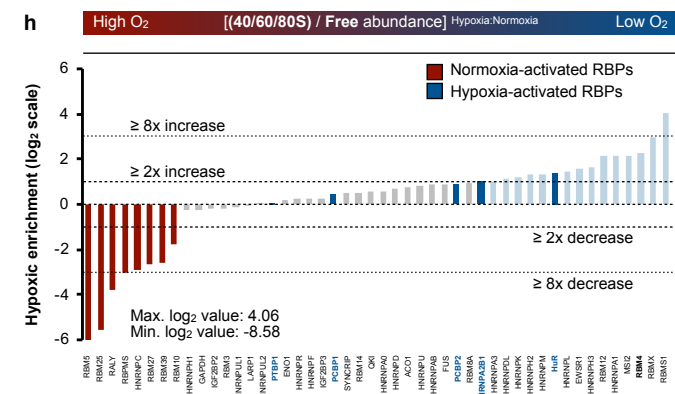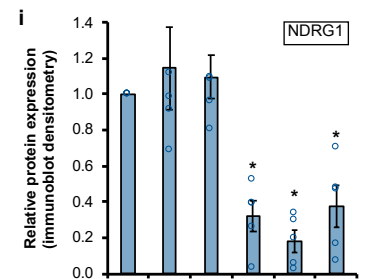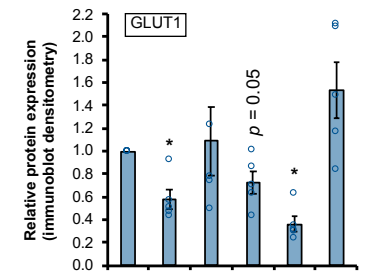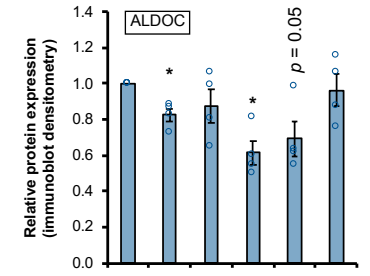

siRNA: NS PCBP1 PCBP2 HuR hnRNP A2/B1 PTBP1

**Supplementary Figure 1.** (a) Schematic of MATRIX (mass spectrometry analysis of active translation factors using ribosome density fractionation and isotopic labeling experiments) workflow. (b) Ribosome density profiles of normoxic (red) and hypoxic (blue) U87MG. (c) Densitometry of immunoblots in Fig. 1e. Asterisk denotes statistical significance calculated using two-sided Student's t-tests compared to normoxia polysome fraction. Exact p values: PCBP1 ( $p = 0.045$ ), PCBP2 ( $p = 0.035$ ), HuR ( $p = 0.046$ ), PTBP1 ( $p = 0.0008$ ). Data represent mean $\pm$ SEM (error bars) of three independent experiments ( $n=3$ ). (d) Representative immunoblots and (e) densitometry of U87MG whole cell lysates. N: normoxia (21% O<sub>2</sub>); H: hypoxia (1% O<sub>2</sub>, 24 hr). Asterisk denotes statistical significance calculated using two-sided Student's t-tests compared to corresponding normoxia control. Exact p value: PCBP1 ( $p = 0.02$ ). Data represent mean $\pm$ SEM of three independent experiments (error bars) ( $n=3$ ). (f) Representative immunoblots and (g) densitometry of U87MG subcellular fractionated samples. WCL: whole cell lysate; Cyto: cytoplasmic; Nuc: nuclear. Asterisk denotes statistical significance calculated using two-sided Student's t-tests compared to corresponding normoxia control. Exact p values: PCBP1 ( $p = 0.04$ ), HuR ( $p = 0.038$ ), hnRNP A2/B1 ( $p = 0.017$ ). Data represent mean $\pm$ SEM (error bars) of three independent experiments ( $n=3$ ). (h) MATRIX readout of relative RBP engagement in translation initiation (ratio of (40/60/80S)/free protein abundance) in hypoxic (1% O<sub>2</sub>, 24 hr, blue) versus normoxic (21% O<sub>2</sub>, 24 hr, red) U87MG. (i) Densitometry of immunoblots in Fig. 1f. Asterisk denotes statistical significance calculated using two-sided Student's t-tests compared to NS control. Exact p values: NDRG1: HuR siRNA ( $p = 0.001$ ), hnRNP A2/B1 siRNA ( $p = 0.0001$ ), PTBP1 siRNA ( $p = 0.006$ ); GLUT1: PCBP1 siRNA ( $p = 0.008$ ), hnRNP A2/B1 siRNA ( $p = 0.0007$ ); ALDOC: PCBP1 siRNA ( $p = 0.017$ ), HuR siRNA ( $p = 0.01$ ). Data represent mean $\pm$ SEM of four independent experiments ( $n=4$ ). Source data are provided as a Source Data file.

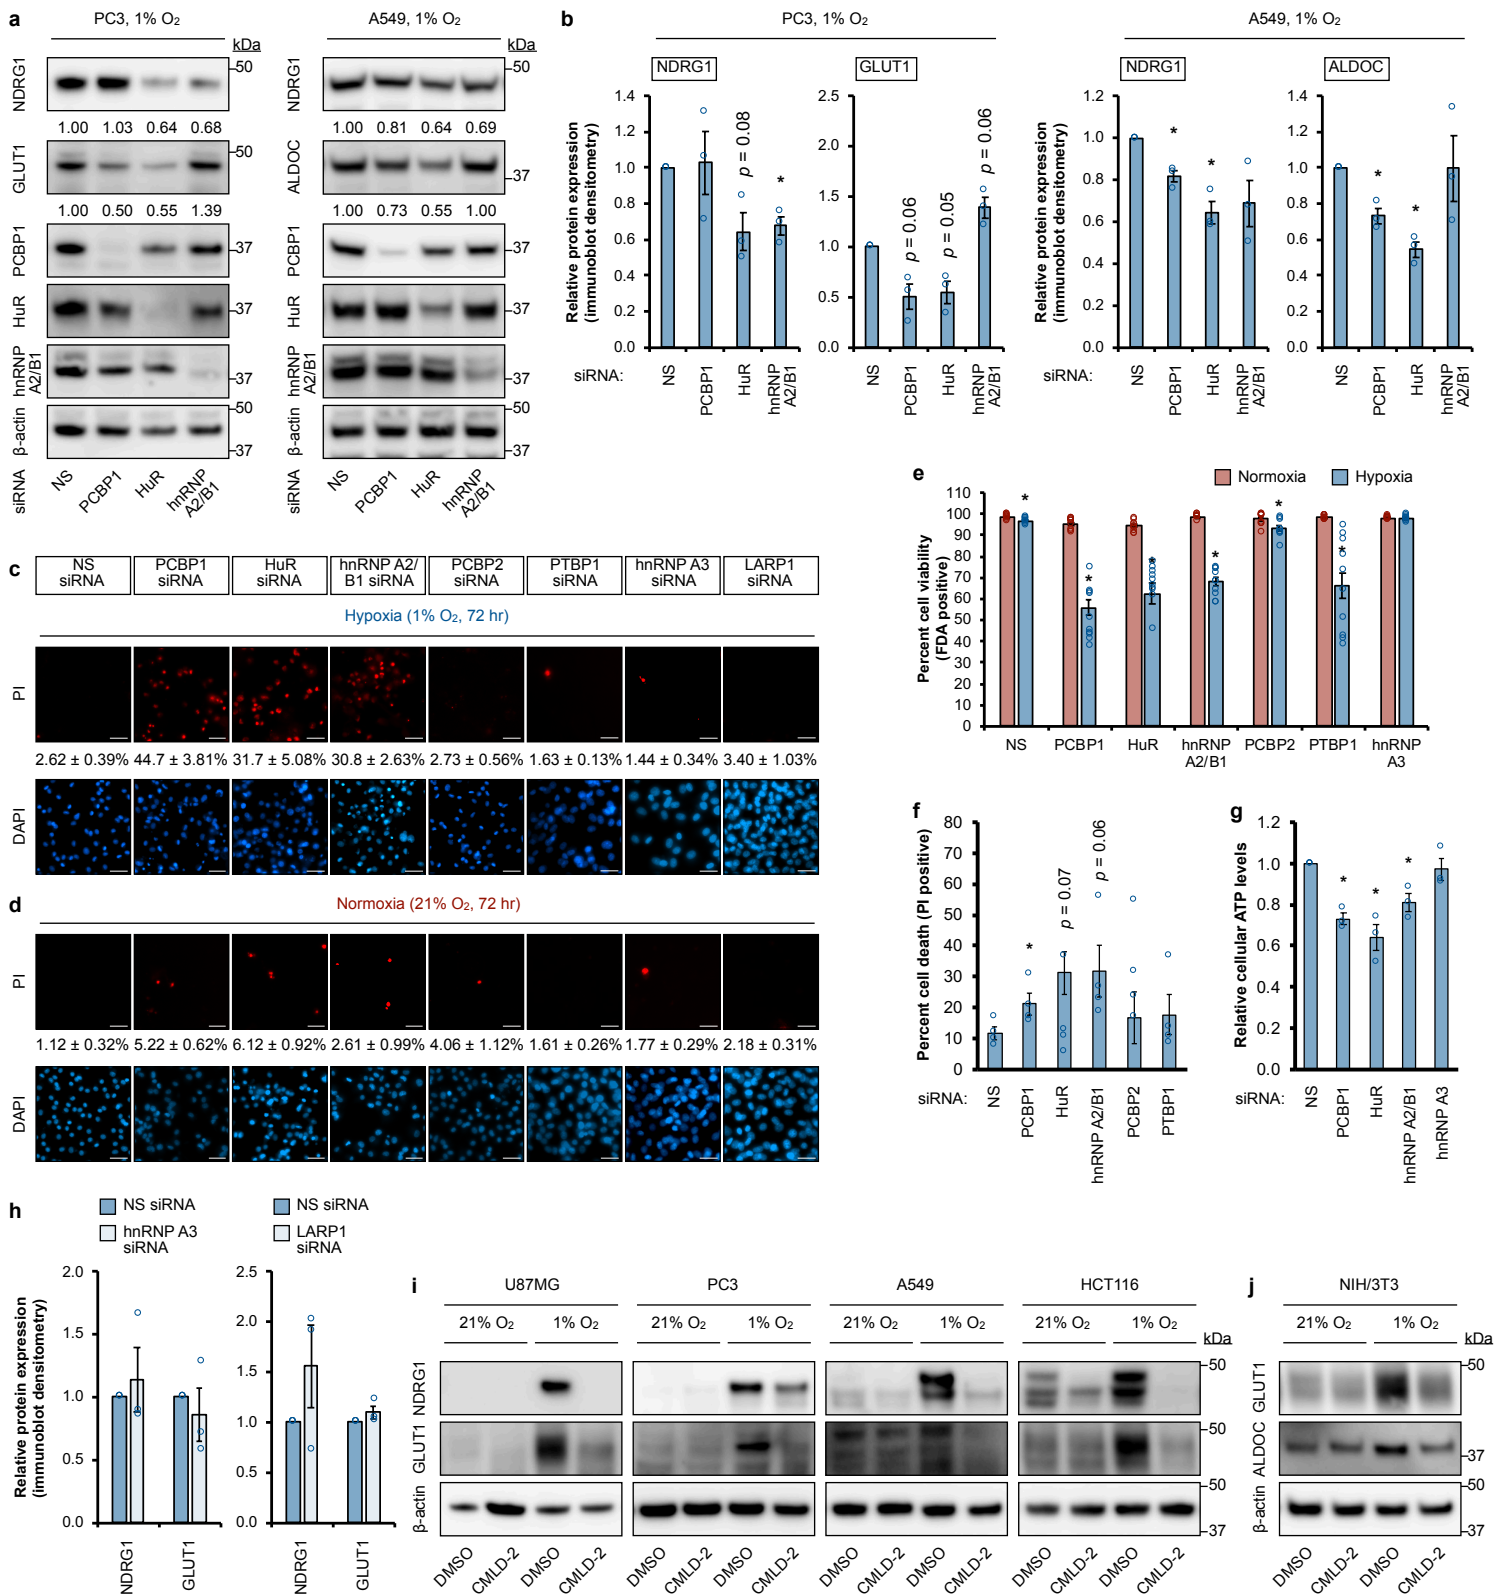

**Supplementary Figure 2.** (a) Representative immunoblots and (b) densitometry of PC3 and A549 treated with indicated siRNAs. NS: Non-silencing. Asterisk denotes statistical significance calculated using two-sided Student's t-tests compared to NS control. Exact p values: NDRG1 (PC3): hnRNP A2/B1 siRNA ( $p = 0.024$ ); NDRG1 (A549): PCBP1 siRNA ( $p = 0.021$ ), HuR siRNA ( $p = 0.022$ ); ALDOC (A549): PCBP1 siRNA ( $p = 0.026$ ), HuR siRNA ( $p = 0.009$ ). Data represent mean $\pm$ SEM (error bars) of three independent experiments ( $n=3$ ). Representative images of (c) hypoxic versus (d) normoxic U87MG treated with indicated siRNAs. Scale bar: 50  $\mu$ m. Quantitation represents mean $\pm$ SEM (error bars) ( $n=10$  fields over three independent experiments). (e) Cell viability measurements by FDA staining in U87MG treated with indicated siRNAs. Hypoxia: 1% O<sub>2</sub>, 72 hr. Asterisk denotes statistical significance calculated using two-sided Student's t-tests compared to corresponding normoxia control. Exact p values: NS siRNA ( $p = 0.004$ ), PCBP1 siRNA ( $p = 6.74e-07$ ), HuR siRNA ( $p = 0.0002$ ), hnRNP A2/B1 siRNA ( $p = 5.17e-08$ ), PCBP2 siRNA ( $p = 0.026$ ), PTBP1 siRNA ( $p = 0.0005$ ), hnRNP A3 siRNA ( $p = 0.551$ ). Data represent mean $\pm$ SEM (error bars) ( $n=10$  fields over three independent experiments). (f) Cell death measurements by propidium iodide (PI) staining in U87MG treated with indicated siRNAs. Hypoxia: 1% O<sub>2</sub>, 24 hr. Asterisk denotes statistical significance calculated using two-sided Student's t-tests compared to NS control. Exact p value: PCBP1 siRNA ( $p = 0.029$ ). Data represent mean $\pm$ SEM (error bars) of four independent experiments ( $n=4$ ). (g) Cell viability measurements based on cellular ATP levels using the CellTiter-Glo® 2.0 Assay (Promega) in U87MG treated with indicated siRNAs. Hypoxia: 1% O<sub>2</sub>, 24 hr. Asterisk denotes statistical significance calculated using two-sided Student's t-tests compared to NS control. Exact p values: PCBP1 siRNA ( $p = 0.01$ ), HuR siRNA ( $p = 0.031$ ), hnRNP A2/B1 siRNA ( $p = 0.047$ ). Data represent mean $\pm$ SEM (error bars) of three independent experiments ( $n=3$ ). (h) Densitometry of immunoblots in Fig. 1h. Data represent mean $\pm$ SEM (error bars) of three independent experiments ( $n=3$ ). Representative immunoblots of (i) human cell lines and (j) NIH/3T3 mouse embryonic fibroblasts treated with HuR-inhibiting compound CMLD-2 or DMSO vehicle control. Three independent experiments ( $n=3$ ) were performed with similar results. Source data are provided as a Source Data file.

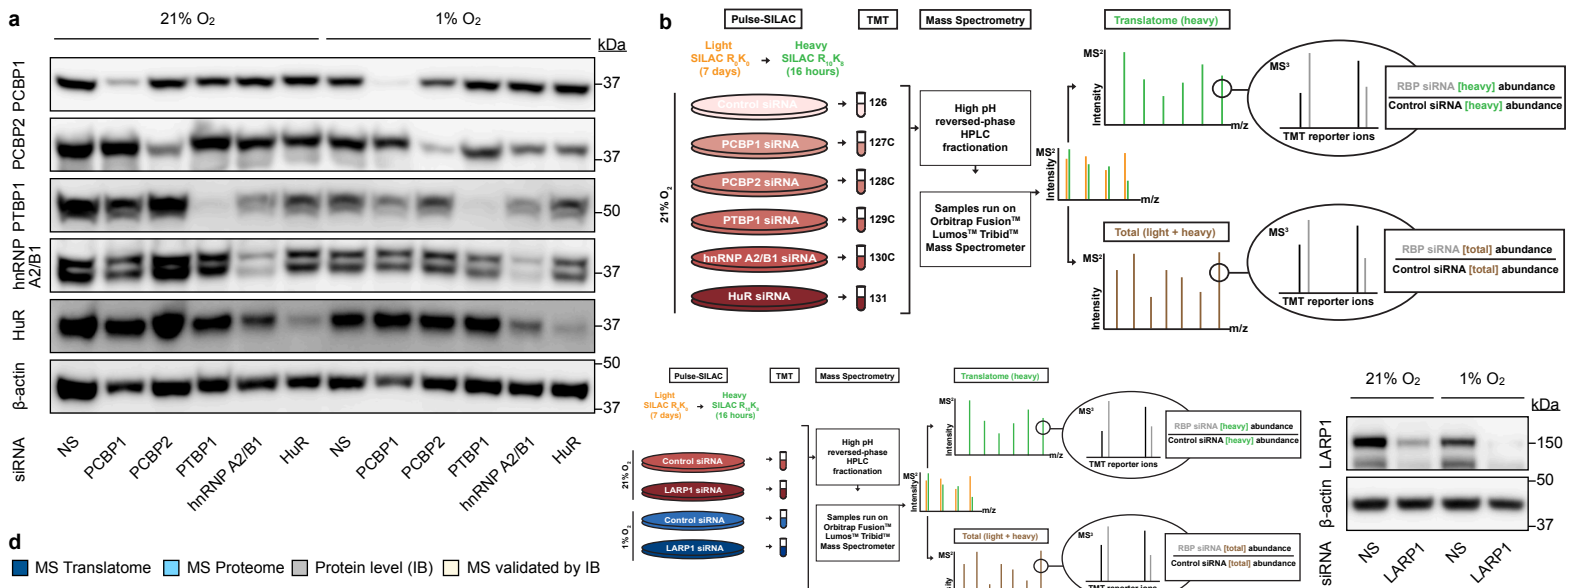

**d**

■ MS Translatome ■ MS Proteome ■ Protein level (IB) □ MS validated by IB

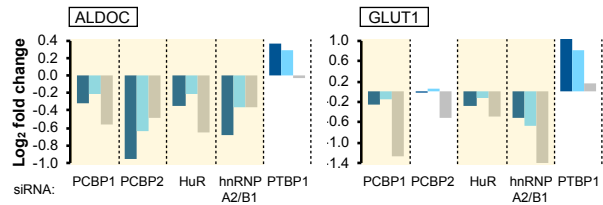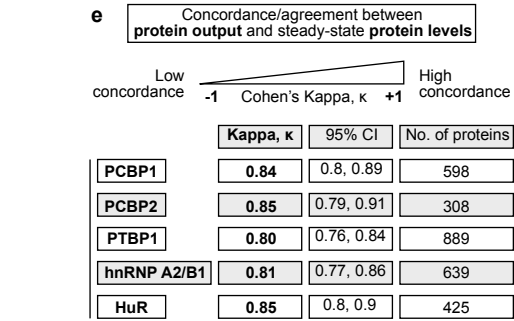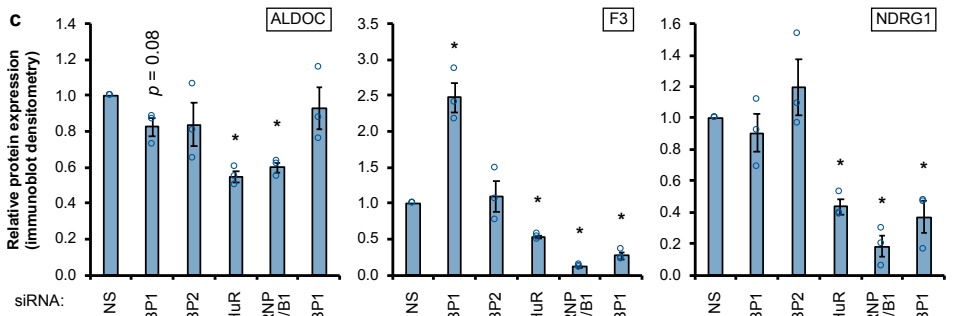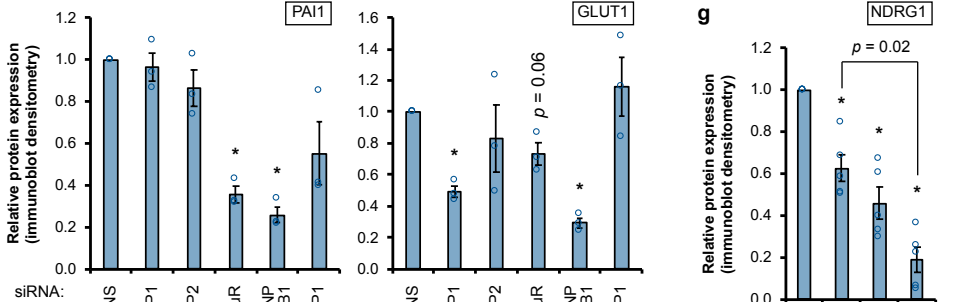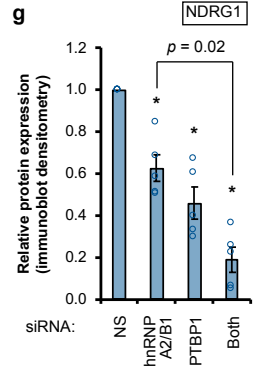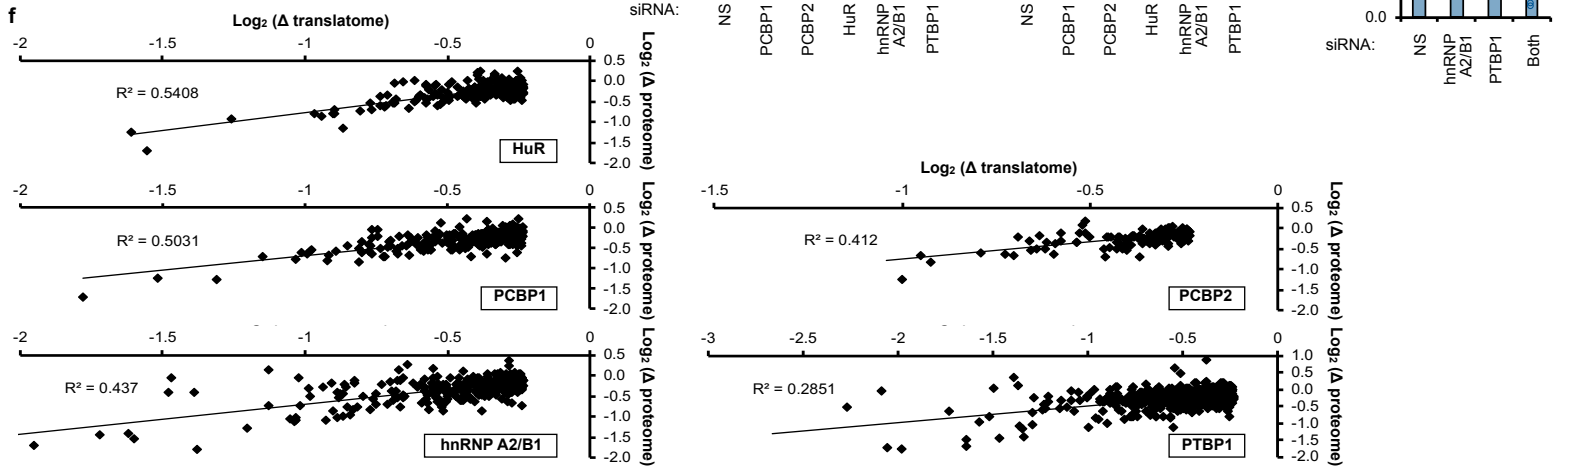

**Supplementary Figure 3.** (a) Representative control immunoblots of U87MG for RBP-dependent TMT-pSILAC translome analysis. NS: Non-silencing. Three independent experiments (n=3) were performed with similar results. (b) Schematic of translome analysis strategy using TMT-pSILAC in normoxic U87MG (upper panel) and LARP1 TMT-pSILAC in hypoxic and normoxic U87MG (lower panels). (c) Densitometry of immunoblots in Fig. 2e. Asterisk denotes statistical significance calculated using two-sided Student's t-tests compared to NS control. Exact p values: ALDOC: HuR siRNA (p = 0.0044), hnRNP A2/B1 siRNA (p = 0.0045); FS: PCBP1 siRNA (p = 0.019), HuR siRNA (p = 0.0021), hnRNP A2/B1 siRNA (p = 0.0002), PTBP1 siRNA (p = 0.0033); NDRG1: HuR siRNA (p = 0.0066), hnRNP A2/B1 siRNA (p = 0.0072), PTBP1 siRNA (p = 0.025); PAI1: HuR siRNA (p = 0.0033), hnRNP A2/B1 siRNA p = 0.0029; GLUT1: PCBP1 siRNA (p = 0.0053), hnRNP A2/B1 siRNA (p = 0.002). Data represent mean±SEM (error bars) of three independent experiments (n=3). (d) Agreement between translome and proteome readouts by MS and immunoblot analyses of representative targets. Three independent experiments were pooled into a single sample for MS measurement. (e) Concordance analysis using Cohen's Kappa statistic between RBP-dependent changes in protein output and steady-state protein levels under hypoxic conditions. (f) Coefficient of determination (R<sup>2</sup>) analysis of each RBP-dependent change in protein output versus steady-state protein levels as measured by TMT-pSILAC. (g) Densitometry of immunoblots in Fig. 2g. Asterisk denotes statistical significance calculated using two-sided Student's t-tests compared to NS control. Exact p values: hnRNP A2/B1 siRNA (p = 0.0042), PTBP1 siRNA (p = 0.0019), both siRNA (p = 0.00018). Data represent mean±SEM (error bars) of five independent experiments (n=5). Source data are provided as a Source Data file.

Canonical hypoxia/HIF-inducible targets regulated by RBPs

| Gene     | PCBP1 | PCBP2 | HuR | hnRNP A2/B1 | PTBP1 |
|----------|-------|-------|-----|-------------|-------|
| ALDOA    | ✓     | -     | -   | -           | -     |
| ALDOC    | ✓     | ✓     | ✓   | ✓           | -     |
| ANXA2    | ✓     | ✓     | -   | -           | -     |
| BNIP3    | -     | ✓     | ✓   | ✓           | -     |
| CA12     | -     | -     | ✓   | ✓           | -     |
| CA9      | -     | -     | -   | ✓           | -     |
| CTSA     | ✓     | -     | ✓   | -           | -     |
| EGLN1    | -     | -     | ✓   | -           | -     |
| ENO1     | ✓     | -     | -   | -           | -     |
| ENO2     | -     | ✓     | -   | ✓           | -     |
| F3       | -     | -     | ✓   | ✓           | ✓     |
| FAM162A  | ✓     | ✓     | ✓   | ✓           | -     |
| GAPDH    | ✓     | -     | -   | ✓           | -     |
| GBE1     | -     | -     | -   | ✓           | -     |
| GPI      | ✓     | ✓     | -   | -           | -     |
| GYS1     | -     | -     | -   | ✓           | -     |
| HK2      | -     | -     | -   | ✓           | -     |
| HMOX1    | -     | -     | ✓   | -           | -     |
| IGFBP3   | -     | -     | -   | ✓           | -     |
| ITGA5    | -     | -     | -   | ✓           | -     |
| LGALS3   | ✓     | -     | ✓   | ✓           | ✓     |
| LOX      | -     | -     | ✓   | ✓           | -     |
| LRP1     | -     | -     | ✓   | ✓           | -     |
| MIF      | ✓     | -     | ✓   | -           | -     |
| NAMPT    | -     | -     | -   | ✓           | ✓     |
| NDRG1    | -     | -     | -   | ✓           | ✓     |
| NFKB1    | -     | ✓     | -   | ✓           | ✓     |
| P4HA1    | -     | ✓     | -   | -           | -     |
| P4HA2    | ✓     | ✓     | ✓   | -           | -     |
| P4HB     | -     | -     | ✓   | -           | -     |
| PFKP     | -     | -     | -   | ✓           | -     |
| PGAM1    | ✓     | ✓     | -   | -           | -     |
| PGK1     | ✓     | -     | -   | -           | -     |
| PKM      | -     | ✓     | -   | -           | -     |
| PLAU     | ✓     | -     | ✓   | -           | -     |
| PLOD2    | -     | -     | ✓   | -           | -     |
| RUVBL2   | -     | -     | -   | -           | ✓     |
| SERPINE1 | -     | -     | -   | ✓           | ✓     |
| SLC16A3  | -     | -     | -   | ✓           | -     |
| SLC2A1   | ✓     | -     | ✓   | ✓           | -     |
| SLC2A3   | -     | -     | ✓   | ✓           | ✓     |
| TFRC     | -     | ✓     | -   | -           | -     |
| TPI1     | -     | -     | -   | ✓           | -     |
| VDAC1    | -     | -     | ✓   | -           | -     |

Canonical hypoxia/HIF-inducible targets not regulated by RBPs

| Gene     | PCBP1 | PCBP2 | HuR | hnRNP A2/B1 | PTBP1 |
|----------|-------|-------|-----|-------------|-------|
| DNAJB6   | -     | -     | -   | -           | -     |
| EIF4EBP1 | -     | -     | -   | -           | -     |
| HK1      | -     | -     | -   | -           | -     |
| LDHA     | -     | -     | -   | -           | -     |
| PFKFB4   | -     | -     | -   | -           | -     |
| PFKL     | -     | -     | -   | -           | -     |
| VEGFA    | -     | -     | -   | -           | -     |

**Supplementary Table 1.** Canonical hypoxia/HIF-inducible proteins regulated (left) and not regulated (right) by hypoxia-adaptive RBPs, determined by TMT-pSILAC.



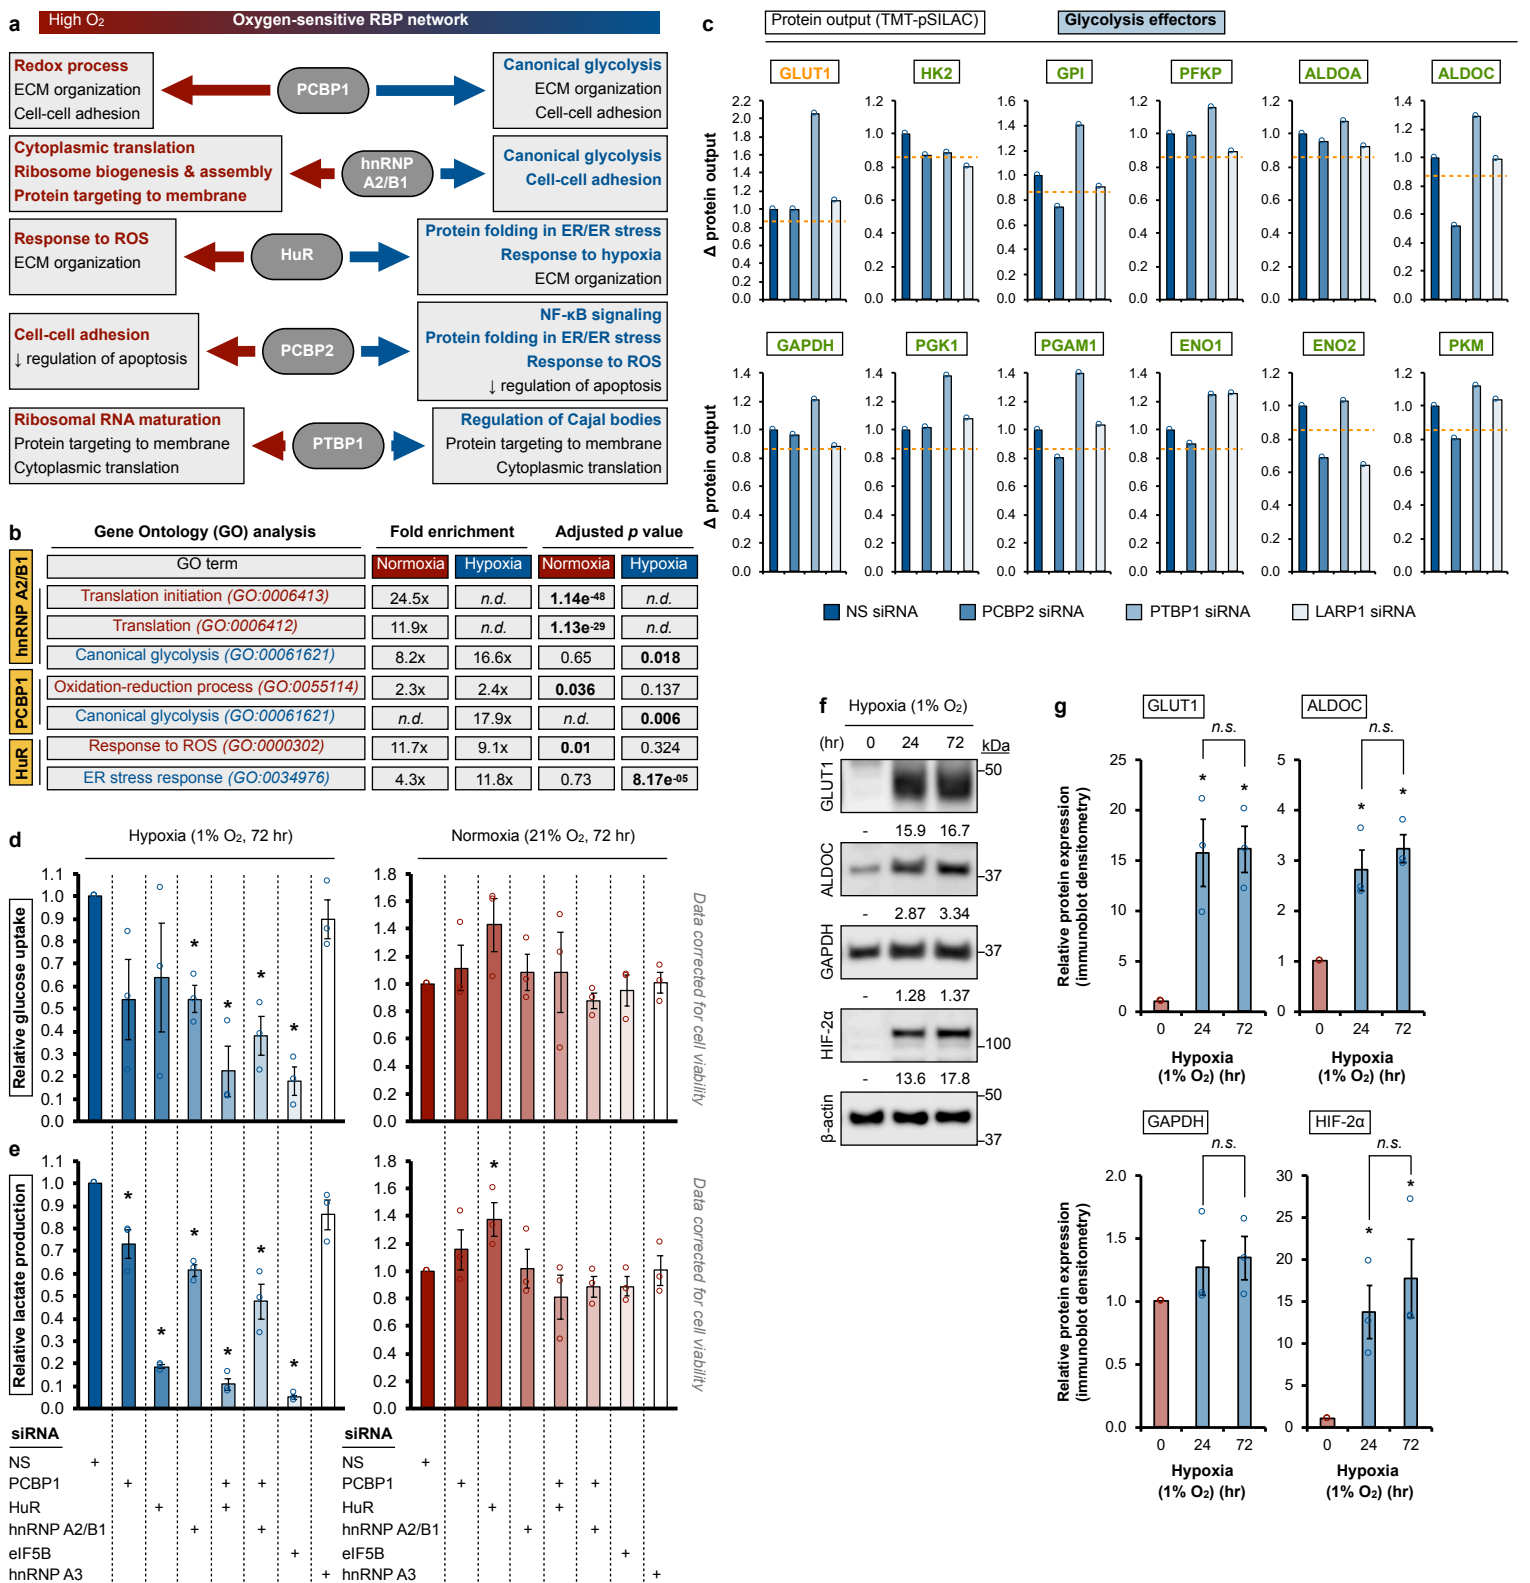

**Supplementary Figure 4.** (a) Oxygen-dependent remodeling of RBP-regulated pathways based on Gene Ontology (GO) pathway enrichment analysis. (b) GO analysis of representative enriched biological processes for down-regulated proteins when indicated RBPs are silenced. (c) Protein output regulation of each glycolytic effector by PCBP2, PTBP1, and LARP1, as determined by TMT-pSILAC (three independent experiments pooled into a single sample for measurement). Orange dotted line represents the validated regulatory threshold. Measurements of (d) glucose uptake and (e) lactate production in U87MG treated with indicated siRNAs. NS: Non-silencing. Asterisk denotes statistical significance calculated using two-sided Student's *t*-tests compared to NS control. Exact *p* values (d): hnRNP A2/B1 siRNA ( $p = 0.0088$ ), PCBP1 + HuR siRNA ( $p = 0.0096$ ), PCBP1 + hnRNP A2/B1 siRNA ( $p = 0.0093$ ), eIF5B siRNA ( $p = 0.0027$ ). Exact *p* values (e): Hypoxia: PCBP1 siRNA ( $p = 0.024$ ), HuR siRNA ( $p = 5.39e-05$ ), hnRNP A2/B1 siRNA ( $p = 0.0022$ ), PCBP1 + HuR siRNA ( $p = 0.0048$ ), PCBP1 + hnRNP A2/B1 siRNA ( $p = 0.011$ ), eIF5B siRNA ( $p = 5.03e-05$ ); Normoxia: HuR siRNA ( $p = 0.047$ ). Data represent mean±SEM (error bars) of three independent experiments ( $n=3$ ). (f) Representative immunoblots and (g) densitometry of U87MG whole cell lysates. Asterisk denotes statistical significance calculated using two-sided Student's *t*-tests compared to normoxia. Exact *p* values: GLUT1: 24 hr ( $p = 0.023$ ), 72 hr ( $p = 0.011$ ); ALDOC: 24 hr ( $p = 0.023$ ), 72 hr ( $p = 0.0076$ ); HIF-2 $\alpha$ : 24 hr ( $p = 0.029$ ), 72 hr ( $p = 0.034$ ). Data represent mean±SEM (error bars) of three independent experiments ( $n=3$ ). Source data are provided as a Source Data file.

|             | Glycolysis enzyme/<br>glucose transporter | CLIP-seq<br>evidence | Transcript-RBP<br>binding region(s) | Publication(s)<br>(PMID or GEO accession)                                                                                                                                                   |
|-------------|-------------------------------------------|----------------------|-------------------------------------|---------------------------------------------------------------------------------------------------------------------------------------------------------------------------------------------|
| hnRNP A2/B1 | Glucose transporter 1                     | Yes                  | 3'-UTR                              | Neuron 92:780; 2016 (27773581)                                                                                                                                                              |
|             | Hexokinase 1/2                            | Yes                  | 3'-UTR                              | Neuron 92:780; 2016 (27773581)                                                                                                                                                              |
|             | Phosphofructokinase                       | Yes                  | 3'-UTR                              | Neuron 92:780; 2016 (27773581)                                                                                                                                                              |
|             | Aldolase A/C                              | Yes                  | 3'-UTR, 5'UTR, coding region        | Neuron 92:780; 2016 (27773581)                                                                                                                                                              |
|             | Glyceraldehyde 3-phosphate dehydrogenase  | Yes                  | 3'-UTR, 5'UTR, coding region        | Neuron 92:780; 2016 (27773581)                                                                                                                                                              |
|             | Enolase 2                                 | Yes                  | 3'-UTR, 5'UTR, coding region        | Neuron 92:780; 2016 (27773581)                                                                                                                                                              |
| PCBP2       | Glucose-6-phosphate isomerase             | Yes                  | 3'-UTR                              | Nature 489:57; 2012 (22955616)                                                                                                                                                              |
|             | Aldolase C                                | Yes                  | 3'-UTR                              | Nature 489:57; 2012 (22955616)                                                                                                                                                              |
|             | Phosphoglycerate mutase 1                 | Yes                  | 3'-UTR                              | Nature 489:57; 2012 (22955616)                                                                                                                                                              |
|             | Enolase 2                                 | Yes                  | 3'-UTR, 5'UTR                       | Nature 489:57; 2012 (22955616)                                                                                                                                                              |
|             | Pyruvate kinase M1/2                      | Yes                  | 3'-UTR, 5'UTR, coding region        | Nature 489:57; 2012 (22955616)                                                                                                                                                              |
| HuR         | Aldolase C                                | Yes                  | 5'UTR, coding region                | Genome Biol 15:R2; 2014 (24393468)                                                                                                                                                          |
|             | Glucose transporter 1                     | Yes                  | 3'-UTR, 5'UTR, coding region        | Nat Methods 15:559; 2011 (21572407)<br>Mol Cell 43:327; 2011 (21723170)<br>Mol Cell 43:340; 2011 (21723171)<br>J Biol Chem 286:37063; 2011 (21890634)<br>Genome Biol 15:R2; 2014 (24393468) |
| PCBP1       | Glucose transporter 1                     | Yes                  | Exon; intron                        | bioRxiv 635888; 2019 (GEO GSE131210)                                                                                                                                                        |
|             | Glucose-6-phosphate isomerase             | Yes                  | Exon (majority); intron             | bioRxiv 635888; 2019 (GEO GSE131210)                                                                                                                                                        |
|             | Aldolase A                                | No                   | -                                   | bioRxiv 635888; 2019 (GEO GSE131210)                                                                                                                                                        |
|             | Aldolase C                                | Yes                  | Exon                                | bioRxiv 635888; 2019 (GEO GSE131210)                                                                                                                                                        |
|             | Glyceraldehyde 3-phosphate dehydrogenase  | Yes                  | Exon (majority); intron             | bioRxiv 635888; 2019 (GEO GSE131210)                                                                                                                                                        |
|             | Phosphoglycerate kinase 1                 | No                   | -                                   | bioRxiv 635888; 2019 (GEO GSE131210)                                                                                                                                                        |
|             | Phosphoglycerate mutase 1                 | Yes                  | Exon; intron                        | bioRxiv 635888; 2019 (GEO GSE131210)                                                                                                                                                        |
|             | Enolase 1                                 | Yes                  | Exon (majority); intron             | bioRxiv 635888; 2019 (GEO GSE131210)                                                                                                                                                        |

**Supplementary Table 2.** Evidence for direct interactions between hypoxia-activated RBPs and mRNAs of glycolytic effectors from publicly available CLIP sequencing data, including the use of the starBase algorithm and database.

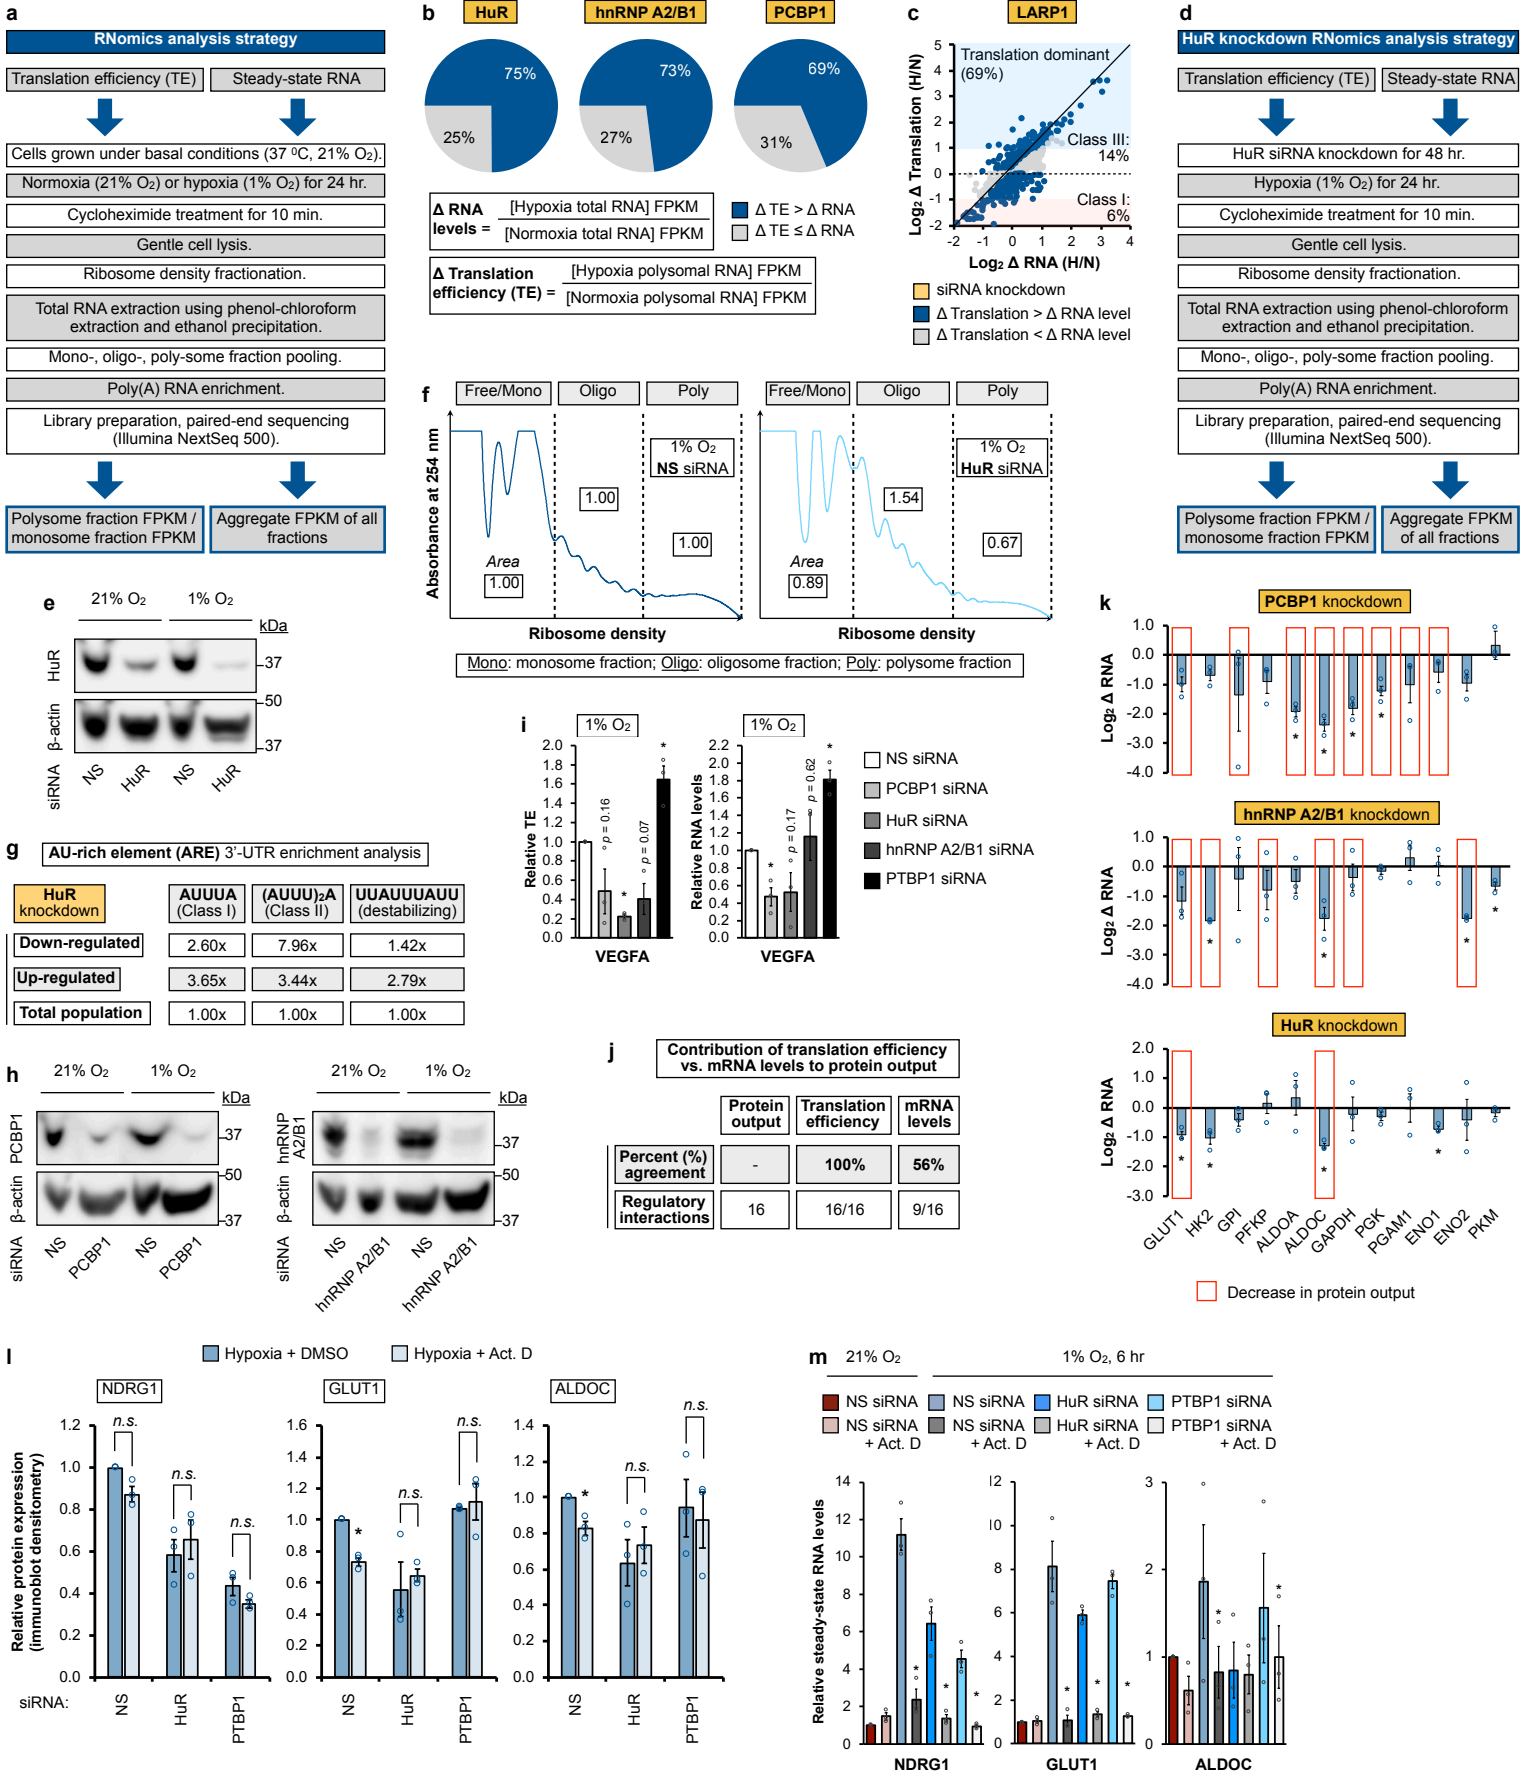

**Supplementary Figure 5.** (a) Schematic of oxygen-dependent RNomics analysis strategy. (b) Percentage of RBP-dependent targets that exhibit a larger translation efficiency fold change compared to RNA level modification. (c) Global analysis of hypoxia-induced translational versus RNA-level changes in U87MG using RNA sequencing of ribosome density fractions for LARP1-dependent targets.  $\Delta$  translation and  $\Delta$  RNA are calculated based on polysomal RNA abundance and total aggregate RNA across all fractions, respectively. (d) Schematic of HuR-dependent RNomics analysis strategy. (e) Representative control immunoblots of U87MG for HuR-dependent RNA sequencing analysis. Three independent experiments (n=3) were performed with similar results. (f) Ribosome density profiles of U87MG treated with HuR-specific and non-silencing (NS) control siRNAs (for 48 hr prior to following experimentation). Area: Area under curve, relative to corresponding normoxic fraction. Three independent experiments (n=3) were performed with similar results. (g) 3'-UTR ARE enrichment analysis of hypoxic, HuR-knockdown RNA sequencing results. (h) Representative control immunoblots of PCBP1- and hnRNP A2/B1-dependent qRT-PCR analysis of ribosome density fractions. Three independent experiments (n=3) were performed with similar results. NS: Non-silencing. (i) qRT-PCR measurements of changes in hypoxic TE (left panel) and steady-state mRNA levels (right panel) of VEGFA in U87MG treated with indicated siRNAs. NS: Non-silencing. Asterisk denotes statistical significance calculated using two-sided Student's t-tests compared to NS control. Exact p values: TE: HuR siRNA (p = 0.0008), PTBP1 siRNA (p = 0.013); Total RNA: PCBP1 siRNA (p = 0.038), PTBP1 siRNA (p = 0.016). Data represent mean $\pm$ SEM (error bars) of three independent experiments (n=3). (j) Percent agreement/predictive value of translation efficiency versus steady-state mRNA levels (qRT-PCR measurements of three independent experiments) and protein output (TMT-pSILAC analysis of three independent experiments pooled into a single sample for measurement). (k) Hypoxic steady-state mRNA level regulation of glycolytic effectors by the hypoxia-adaptive RBPs PCBP1, hnRNP A2/B1, and HuR, as determined by qRT-PCR of ribosome density fractions. Asterisk denotes statistical significance calculated using two-sided Student's t-tests compared to non-silencing control. Exact p values: PCBP1 siRNA: ALDOA (p = 0.007), ALDOC (p = 0.006), GAPDH (p = 0.013), PGK (p = 0.015); hnRNP A2/B1 siRNA: HK2 (p = 0.0001), ALDOC (p = 0.043), ENO2 (p = 0.0007), PKM (p = 0.034); HuR siRNA: GLUT1 (p = 0.01), HK2 (p = 0.038), ALDOC (p = 0.002), ENO1 (p = 0.015). Data represent mean $\pm$ SEM (error bars) of three independent experiments (n=3). Red box: observed decrease in protein output as determined by TMT-pSILAC. (l) Densitometry of immunoblots in Fig. 4g. Asterisk denotes statistical significance calculated using two-sided Student's t-tests compared to corresponding hypoxia + DMSO control. Exact p values: GLUT1 NS siRNA (p = 0.0096); ALDOC NS siRNA (p = 0.042). Data represent mean $\pm$ SEM (error bars) of three independent experiments (n=3). (m) Steady-state mRNA level measurements by qRT-PCR of normoxic and hypoxic (6 hr) U87MG treated with actinomycin D (Act. D) or vehicle DMSO. NS: Non-silencing. Asterisk denotes statistical significance calculated using two-sided Student's t-tests compared to NS control. Exact p values: NDRG1 (1% O<sub>2</sub>): NS siRNA (p = 0.0017), HuR siRNA (p = 0.0005), PTBP1 siRNA (p = 0.0007); GLUT1 (1% O<sub>2</sub>): NS siRNA (p = 0.0002), HuR siRNA (p = 0.0005), PTBP1 siRNA (p = 6.54e-05); ALDOC (1% O<sub>2</sub>): NS siRNA (p = 0.012), PTBP1 siRNA (p = 0.0078). Data represent mean $\pm$ SEM (error bars) of three independent experiments (n=3). Source data are provided as a Source Data file.

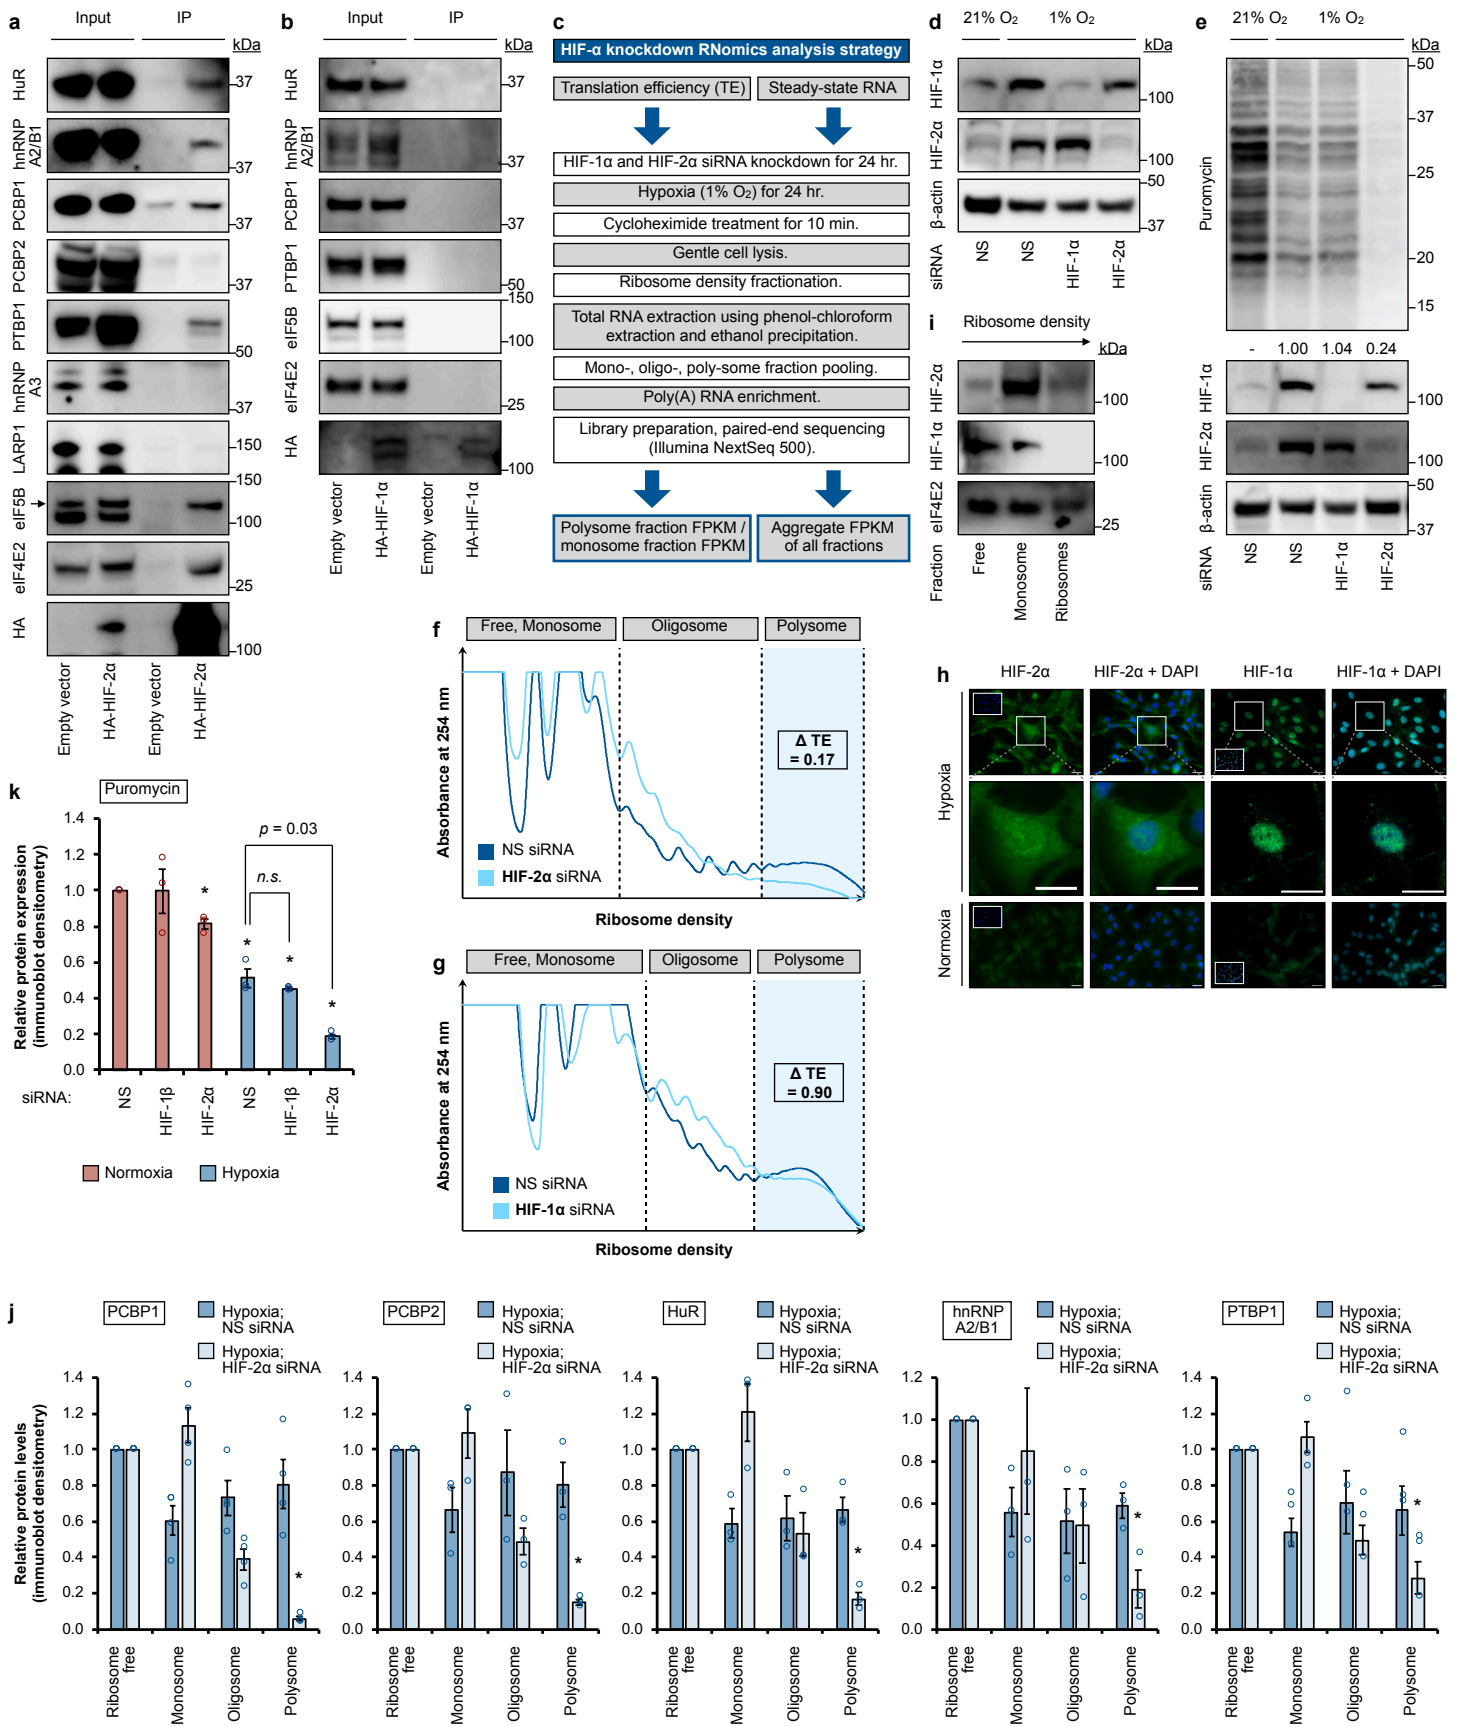

**Supplementary Figure 6.** Representative immunoblots of (a) HA-HIF-2 $\alpha$  and (b) HA-HIF-1 $\alpha$  co-immunoprecipitations in U87MG. Three independent experiments (n=3) were performed with similar results. (c) Schematic of HIF- $\alpha$  RNomics analysis strategy. (d) Representative control immunoblots of U87MG for HIF-1 $\alpha$  and HIF-2 $\alpha$ -dependent RNA sequencing analysis of ribosome density fractions. Three independent experiments (n=3) were performed with similar results. (e) Representative immunoblots of U87MG treated with indicated siRNAs. Puromycin incorporation was used as a measure of global translational intensity. NS: Non-silencing. Quantitation represents mean of three independent experiments (n=3). Ribosome density profiles of U87MG treated with (f) HIF-2 $\alpha$ - and (g) HIF-1 $\alpha$ -specific versus non-silencing (NS) control siRNAs.  $\Delta$  translation efficiency (TE) was determined based on area under curve ratios of polysome/free, monosome in HIF- $\alpha$ -specific versus NS siRNA samples. (h) Representative immunocytochemistry images of endogenous HIF-2 $\alpha$  and HIF-1 $\alpha$  in normoxic and hypoxic U87MG (n=10 fields over three independent experiments). Scale bar: 20  $\mu$ m. (i) Representative immunoblots of hypoxic U87MG ribosome density fractions. Three independent experiments (n=3) were performed with similar results. (j) Densitometry of immunoblots in Fig. 5f. Asterisk denotes statistical significance calculated using two-sided Student's t-tests compared to NS control. Exact p values: PCBP1 (p = 0.021), PCBP2 (p = 0.038), HuR (p = 0.041), hnRNP A2/B1 (p = 0.0093), PTBP1 (p = 0.049). Data represent mean $\pm$ SEM (error bars) of three independent experiments (n=3). (k) Densitometry of immunoblots in Fig. 5h. Asterisk denotes statistical significance calculated using two-sided Student's t-tests compared to normoxia NS control. Exact p values: Normoxia: HIF-2 $\alpha$  siRNA (p = 0.018); Hypoxia: NS siRNA (p = 0.01), HIF-1 $\beta$  siRNA (p = 9.63e-05), HIF-2 $\alpha$  siRNA (p = 0.00029). Data represent mean $\pm$ SEM (error bars) of three independent experiments (n=3). Source data are provided as a Source Data file.

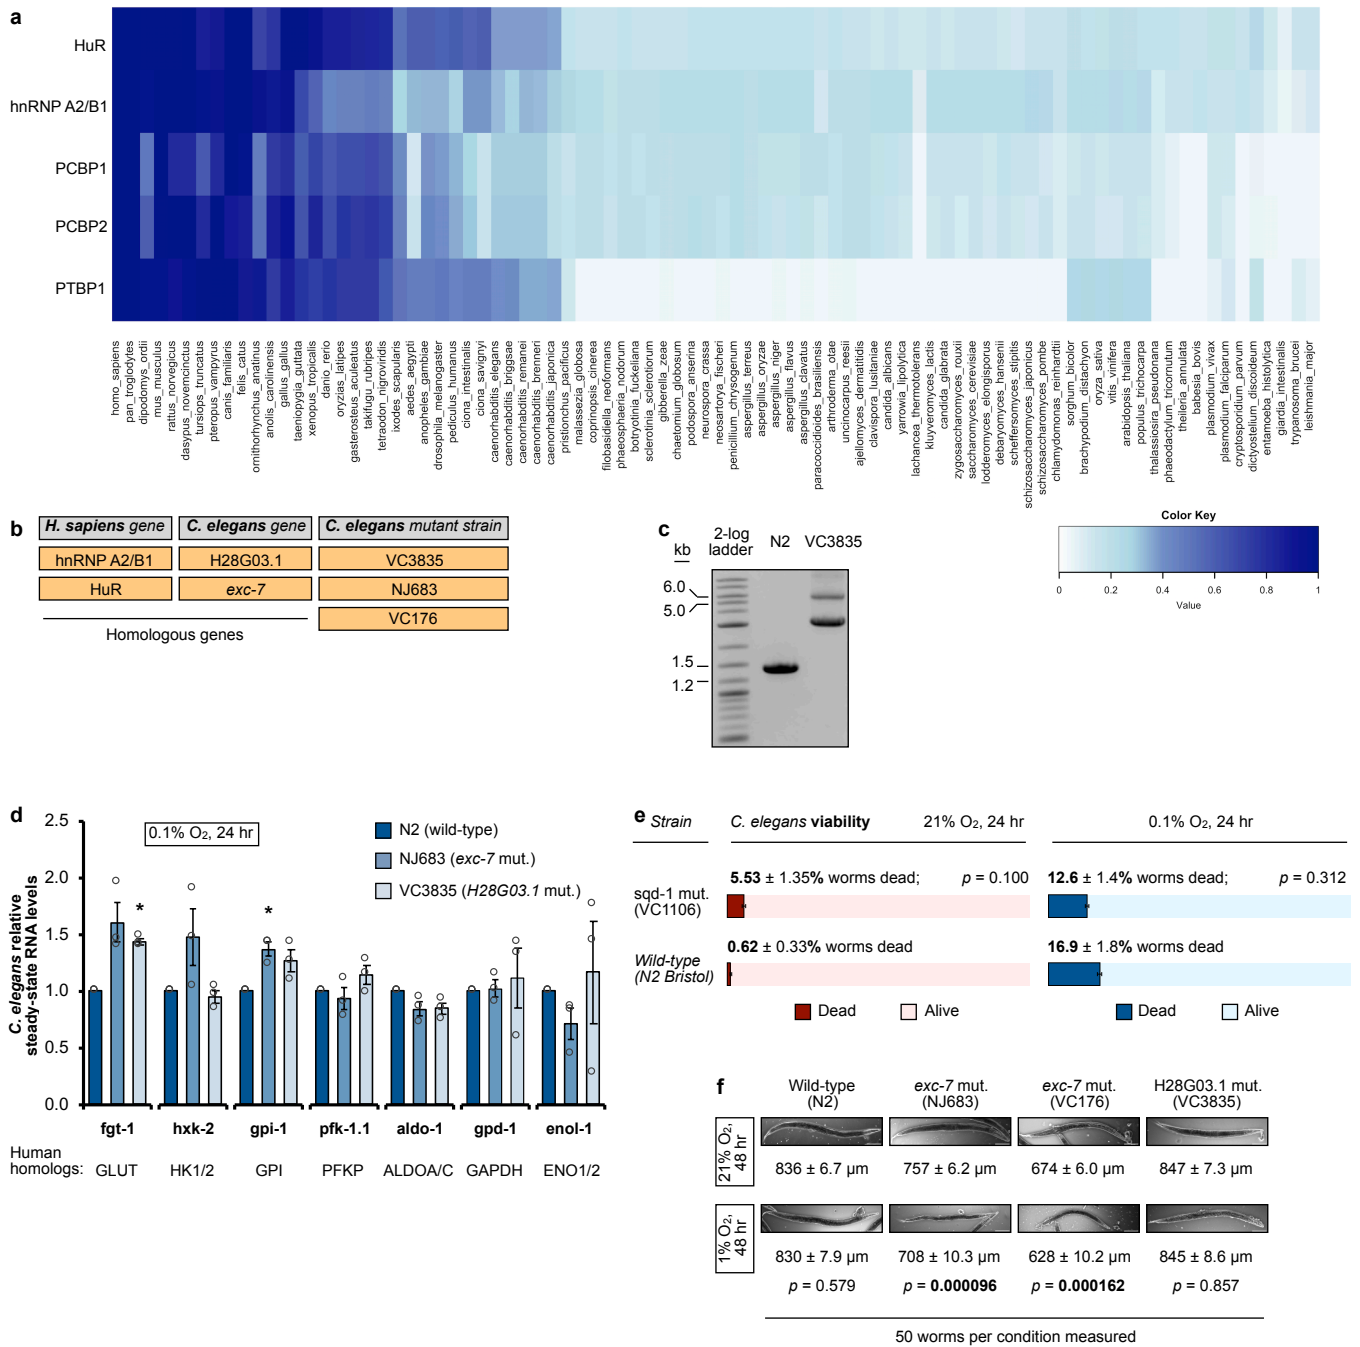

**Supplementary Figure 7.** (a) Normalized phylogenetic profiling using the PhyloGene algorithm across species. (b) *C. elegans* homologs of HuR and hnRNP A2/B1 and strains carrying deletion mutations. (c) Representative PCR genotyping of the H28G03.1 mutation in the VC3835 strain. This results was confirmed in three independent experiments (*n*=3). (d) Total steady-state mRNA levels of glycolytic effectors in hypoxic (0.1% O<sub>2</sub>) *C. elegans* that contain wild-type (N2) or mutant homologs of HuR (*exc-7*, strain NJ683) or hnRNP A2/B1 (H28G03.1, strain VC3835), as measured by qRT-PCR. Asterisk denotes statistical significance calculated using two-sided Student's *t*-tests compared to wild-type control. Exact *p* values: NJ683: *gpi-1* (*p* = 0.032); VC3835: *fgt-1* (*p* = 0.0032). Data represent mean±SEM (error bars) of three independent experiments (*n*=3). (e) Measurements of normoxic and hypoxic death for adult (Day 1 at the start of treatment) *C. elegans* that contain wild-type (N2) or mutant *sqd-1*, a paralog of H28G03.1 (strain VC1106). Data represent mean±SEM (error bars) of three independent experiments (*n*=3; total number of worms for N2, VC1106: 703, 270, respectively). Statistical significance was calculated using two-sided Student's *t*-tests compared to wild-type control. Exact *p* values are indicated in the figure. (f) Representative images depicting differences in body length of *C. elegans* strains (L1 larvae at the start of treatment) under normoxic and hypoxic conditions. Scale bar: 100 μm. Measurements represent mean±SEM (*n*=50 worms). Statistical significance was calculated using two-sided Student's *t*-tests compared to corresponding normoxia control. Exact *p* values are indicated in the figure. Source data are provided as a Source Data file.
